# Supplementary material
Source: PubMed Central journal article supplement (PMC5444175)
Supplement: AAC.00059-17_zac005176184s1.pdf [file AAC.00059-17_zac005176184s1.pdf]

## SUPPORTING INFORMATION

Characterizing the Antimicrobial Activity of  $N^2,N^4$ -Disubstituted Quinazoline-2,4-Diamines Towards  
Multidrug Resistant *Acinetobacter baumannii*

Renee Fleeman<sup>1,2#</sup>, Kurt S. Van Horn<sup>3#§</sup>, Megan M. Barber<sup>3^</sup>, Whitney N. Burda<sup>1&</sup>, David L. Flanigan<sup>3</sup>  
Roman Manetsch<sup>4\*</sup> and Lindsey N. Shaw<sup>1,2\*</sup>

<sup>1</sup>Department of Cell Biology, Microbiology and Molecular Biology, <sup>2</sup>Center for Drug Discovery and Innovation, <sup>3</sup>Department of Chemistry, University of South Florida, 4202 East Fowler Avenue, Tampa, FL 33620

<sup>4</sup>Department of Chemistry and Chemical Biology and Department of Pharmaceutical Sciences Northeastern University, 102 Hurtig Hall, 360 Huntington Avenue, Boston, MA 02115, USA.

<sup>§</sup> Avista Pharma Solutions, 3501 Tricenter Blvd, Durham NC 27713

<sup>^</sup>Department of Pharmacy, Lake Erie College of Osteopathic Medicine, 1858 W Grandview Blvd, Erie, Pennsylvania 16509

<sup>&</sup>Department of Infectious Diseases & Pathology, College of Veterinary Medicine, University of Florida 2015 SW 16<sup>th</sup> Ave, Gainesville, FL 32608

Author Contributions: #R. M. Fleeman and K. S. Van Horn contributed equally.

**Materials and Methods.** All commercially available chemical reagents, except for the boronic acids, and anhydrous solvents were purchased from either Sigma Aldrich, Oakwood Products, Inc. or TCI America and used without any further purification. Boronic acids used were purchased through Frontier Scientific. NMR spectra were recorded at ambient temperature on a 400 MHz or 500 MHz Varian NMR spectrometer in the solvent indicated. Data for <sup>1</sup>H NMR are reported as follows: chemical shift ( $\delta$  ppm), multiplicity (s

= singlet, d = doublet, t = triplet, q = quartet, p = pentet, m = multiplet), integration and coupling constant (Hz) whereas  $^{13}\text{C}$  NMR analyses were reported in terms of chemical shift ( $\delta$  ppm). NMR data was analyzed by using MestReNova Software version 10.0.1-14719. The purity of the final compounds was determined to be  $\geq 95\%$  by high-performance liquid chromatography (HPLC) using an Agilent 1100 LC/MSD-VL with electrospray ionization. Low-resolution mass spectra were performed on an Agilent 1100 LC/MSD-VL with electrospray ionization. High resolution mass spectra (HRMS) were performed on an Agilent LC/MSD TOF system G3250AA. Analytical thin layer chromatography (TLC) was performed on silica gel 60 F254 precoated plates (0.25 mm) from EMD Chemical Inc., and components were visualized by ultraviolet light (254 nm). EMD silica gel 230-400 (particle size 40-63  $\mu\text{m}$ ) mesh was used for all flash column chromatography.

**Synthetic Protocols and Compound Characterization:** See Supplemental Figure S1.

**Procedure A:** Suzuki-Miyaura Cross Coupling with  $N^2$ -benzyl-6-bromo- $N^4$ -methylquinazolin-2,4-diamine to yield 6-alkenyl- $N^2$ -benzyl- $N^4$ -methylquinazolin-2,4-diamine and 6-aryl- $N^2$ -benzyl- $N^4$ -methylquinazolin-2,4-diamine.<sup>22</sup> One equivalent of  $N^2$ -benzyl-6-bromo- $N^4$ -methylquinazolin-2,4-diamine (0.23 mmol), 1.5 equivalents of the boronic acid (0.35 mmol), 5 mol-% of tetrakis-palladium, a saturated solution of sodium bicarbonate (1.23 mL), and anhydrous dimethoxyethane (1.87 mL) were combined in a sealed microwave tube, under argon, and heated in the microwave to 150 °C. The reaction was monitored by TLC and LCMS until no starting material was observed. The reaction was cooled to room temperature, diluted with dichloromethane. The organic layer was separated and washed with equal volume of water three times, then dried over sodium sulfate. Purification of final product was completed by column chromatography using dichloromethane and methanol.

**Procedure B:** Hydrogenation of 6-alkenyl- $N^2$ -benzyl- $N^4$ -methylquinazolin-2,4-diamine to Yield 6-alkanyl- $N^2$ -benzyl- $N^4$ -methylquinazolin-2,4-diamine

One equivalent of 6-alkenyl-*N*<sup>2</sup>-benzyl-*N*<sup>4</sup>-methylquinazolin-2,4-diamine was combined with 5 mol% of palladium on carbon in methanol to afford a 2mg/mL solution and fixed with a hydrogen balloon. The reaction was monitored by LC-MS until no starting material was present. The reaction was filtered over celite and rinsed with three equal volumes of methanol. Purification by column chromatography using dichloromethane and methanol was used to obtain the pure product.

**Procedure C:** Cyclization of Anthranilic Acids to the Corresponding Quinazoline-2,4-diones

One equivalent of the commercially available anthranilic acid and three equivalents of urea were ground in a mortar and pestle until a homogenous mixture was obtained. This powder was then transferred to a round bottom flask and heated to 200 °C uncovered. After 3 hours the mixture was cooled, triturated with 10 mL of water, the solid filtered and subsequently washed with 40 mL of water. Crude product was dried and no further purification was completed.

**Procedure D:** Chlorination of Quinazoline-2,4-diones to the Corresponding 2,4-Dichloroquinazoline

One equivalent of quinazoline-2,4-dione and one equivalent of *N,N*-dimethylaniline were combined in a round bottom flask, 12 equivalents of phosphorus oxychloride was then added. The mixture was refluxed under argon until the presence of starting material was no longer seen by TLC or by LC-MS (6-24 hours). Upon completion the reaction mixture was cooled and slowly added to ice equaled to ten times that of the reaction volume. Upon precipitation the reaction was filtered and washed with water to afford the crude 2,4-dichloroquinazoline which was purified by column chromatography using hexanes and ethyl acetate.

**Procedure E:** Amine Substitution of 2,4-Dichloroquinzaolines to Yield 4-Amino-substituted-2-chloroquinazoline

One equivalent of the crude 2,4-dichloroquinazoline, 1.1 equivalents of sodium acetate, and 1.1 equivalents were combined in a round bottom flask and mixed with a three to one solution of tetrahydrofuran and water to afford a 0.1 M solution. The reaction was heated to 65 °C and monitored until no starting material was

seen by TLC or LC-MS. The reaction was diluted with ethyl acetate and the organic layer separated. This organic layer was washed three times with equal amounts of water and then dried over sodium sulfate. The crude 4-amino-substituted-2-chloroquinazoline was then purified by column chromatography using hexane and ethyl acetate.

**Procedure F:** Amine Substitution of 4-Aminosubstituted-2-chloroquinazolines to Yield 2,4-Diamino-substituted Quinazolines

One equivalent of 4-aminosubstituted-2-chloroquinazoline and 1.5 equivalents of amine were combined with ethanol to create a 0.2 M solution which was heated to 150 °C in a sealed tube. The reaction was monitored by TLC and LC-MS for the absence of starting material (8-18 hours). The reaction was purified by either method F<sup>1</sup> or F<sup>2</sup>.

**Purification Method F<sup>1</sup>:** Compound crystallized out of the cool solution, was filtered, and rinsed with cold ethanol.

**Purification Method F<sup>2</sup>:** Solvent was evaporated and crude product was purified via column chromatography using dichloromethane and methanol.

Compound **8** has been reported previously.<sup>7</sup>

**2,6-Dichloro-*N*-methylquinazolin-4-amine:** 0.13 g (0.54 mmol) of 2,4,6-trichloroquinazoline was reacted with methylamine and purified according to general procedure C to furnish 0.11 g of the title compound in 92 % yield. <sup>1</sup>H NMR (500 MHz, CDCl<sub>3</sub>) δ 7.69 (d, *J* = 9.1 Hz, 1H), 7.37 (dd, *J* = 9.1, 2.6 Hz, 1H), 6.97 (d, *J* = 2.7 Hz, 1H), 3.86 (s, 3H), 3.22 (d, *J* = 4.8 Hz, 3H). <sup>13</sup>C NMR (126 MHz, CDCl<sub>3</sub>) δ 161.2, 158.9, 151.5, 139.6, 126.9, 123.5, 122.2, 111.7, 28.6. R<sub>f</sub> = 0.82 (DCM/MeOH 10:1).

***N*<sup>2</sup>-Benzyl-6-chloro-*N*<sup>4</sup>-methylquinazoline-2,4-diamine (**1**):** 0.10 g (0.44 mmol) of 2,6-dichloro-*N*-methylquinazolin-4-amine was reacted with benzylamine and purified according to general procedure D to furnish 87.0 mg of the title compound as a white crystalline solid in 45 % yield. <sup>1</sup>H NMR (400 MHz,

CD<sub>3</sub>OD)  $\delta$  7.80 (d,  $J$  = 2.3 Hz, 1H), 7.41 (dd,  $J$  = 8.9, 2.4 Hz, 1H), 7.34 (dd,  $J$  = 7.9, 0.9 Hz, 2H), 7.29 – 7.22 (m, 3H), 7.20 – 7.13 (m, 1H), 4.63 (s, 2H), 2.98 (s, 3H). HRMS:  $m/z$  calculated for C<sub>16</sub>H<sub>16</sub>ClN<sub>4</sub> [M+H]<sup>+</sup> 299.1058; found 299.1061.  $R_f$  = 0.33 (DCM/MeOH 10:1).

**2,7-Dichloro-*N*-methylquinazolin-4-amine:** 0.20 g (0.86 mmol) of 2,4,7-trichloroquinazoline was reacted with methylamine and purified according to general procedure C to furnish 0.17 g of the title compound in 72 % yield. <sup>1</sup>H NMR (500 MHz, CDCl<sub>3</sub>)  $\delta$  7.72 (d,  $J$  = 2.0 Hz, 1H), 7.62 (d,  $J$  = 8.8 Hz, 1H), 7.39 (dd,  $J$  = 8.7, 2.0 Hz, 1H), 3.22 (d,  $J$  = 4.9 Hz, 3H). <sup>13</sup>C NMR (126 MHz, CDCl<sub>3</sub>)  $\delta$  161.2, 158.9, 151.5, 139.6, 126.9, 122.2, 123.5, 111.7, 28.6.  $R_f$  = 0.80 (DCM/MeOH 10:1).

***N*<sup>2</sup>-Benzyl-7-chloro-*N*<sup>4</sup>-methylquinazoline-2,4-diamine (2):** 0.15 g (0.66 mmol) of 2,7-dichloro-*N*-methylquinazolin-4-amine was reacted with benzylamine and purified according to general procedure D to furnish 66.0 mg of the title compound as a white crystalline solid in 68 % yield. <sup>1</sup>H NMR (500 MHz, DMSO)  $\delta$  8.21 – 8.11 (m, 1H), 8.08 (d,  $J$  = 8.5 Hz, 1H), 7.51 (d,  $J$  = 7.8 Hz, 2H), 7.44 (t,  $J$  = 7.8 Hz, 2H), 7.35 (q,  $J$  = 7.5, 6.3 Hz, 2H), 7.18 (d,  $J$  = 8.6 Hz, 1H), 4.70 (d,  $J$  = 6.4 Hz, 2H), 3.53 (s, 1H), 3.09 (d,  $J$  = 4.5 Hz, 3H). HRMS:  $m/z$  calculated for C<sub>16</sub>H<sub>16</sub>ClN<sub>4</sub> [M+H]<sup>+</sup> 299.1058; found 299.1059.  $R_f$  = 0.38 (DCM/MeOH 10:1).

**2-Chloro-6-methoxy-*N*-methylquinazolin-4-amine:** 0.10 g (0.44 mmol) of 2,4-dichloro-6-methoxyquinazoline was reacted with methylamine and purified according to general procedure C to furnish 81 mg of the title compound in 83 % yield. <sup>1</sup>H NMR (500 MHz, CDCl<sub>3</sub>)  $\delta$  8.12 (d,  $J$  = 7.5 Hz, 1H), 7.56 (dd,  $J$  = 7.5, 1.5 Hz, 1H), 6.78 (d,  $J$  = 1.4 Hz, 1H), 3.87 (s, 2H), 2.91 (s, 2H), 2.30 (s, 1H). <sup>13</sup>C NMR (126 MHz, CDCl<sub>3</sub>)  $\delta$  160.7, 158.5, 154.2, 148.7, 127.3, 121.8, 110.5, 109.0, 55.8, 28.3.  $R_f$  = 0.48 (DCM/MeOH 10:1).

***N*<sup>2</sup>-Benzyl-6-methoxy-*N*<sup>4</sup>-methylquinazoline-2,4-diamine (3):** 70.0 mg (0.24 mmol) of 2-chloro-6-methoxy-*N*-methylquinazolin-4-amine was reacted with benzylamine and purified according to general procedure D to furnish 30.0 mg of the title compound as a white crystalline solid in 45 % yield. <sup>1</sup>H NMR

(500 MHz, CDCl<sub>3</sub>) δ 7.45 (d, *J* = 9.1 Hz, 1H), 7.41 (d, *J* = 7.1 Hz, 2H), 7.32 (t, *J* = 7.6 Hz, 2H), 7.28 – 7.21 (m, 2H), 6.87 (d, *J* = 2.7 Hz, 1H), 4.73 (d, *J* = 5.7 Hz, 2H), 3.83 (s, 3H), 3.11 (d, *J* = 4.7 Hz, 3H). HRMS: *m/z* calculated for C<sub>17</sub>H<sub>19</sub>N<sub>4</sub> [M+H]<sup>+</sup> 295.1553; found 295.1556. R<sub>f</sub> = 0.26 (DCM/MeOH 10:1).

**6-Bromo-2,4-dichloroquinazoline:** 3.0 g (13.89 mmol) of commercially available 2-amino-5-bromobenzoic acid was reacted according to general procedure C to give crude 6-bromoquinazoline-2,4(1*H*,3*H*)-dione. Without further purification, 3.4g (14.12 mmol) of crude 6-bromoquinazoline-2,4(1*H*,3*H*)-dione was reacted and purified according to general procedure D to give 1.18 g of the title compound as a beige solid in 30% yield. <sup>1</sup>H NMR (500 MHz, CDCl<sub>3</sub>) δ 8.41 (d, *J* = 2.1 Hz, 1H), 8.05 (dd, *J* = 8.9, 2.1 Hz, 1H), 7.88 (d, *J* = 8.9 Hz, 1H). <sup>13</sup>C NMR (126 MHz, CDCl<sub>3</sub>) δ 162.77, 155.44, 151.02, 139.71, 129.62, 128.21, 123.35, 123.21. R<sub>f</sub> = 0.88 (DCM/MeOH 10:1).

**6-Bromo-2-chloro-*N*-methylquinazolin-4-amine:** 100 mg (0.36 mmol) of 6-bromo-2,4-dichloroquinazoline was reacted with methylamine and purified according to procedure E to furnish 89 mg of the title compound in 91% yield. <sup>1</sup>H NMR (500 MHz, CDCl<sub>3</sub>) δ 7.82 (d, *J* = 1.9 Hz, 1H), 7.79 (dd, *J* = 8.8, 2.0 Hz, 1H), 7.64 (d, *J* = 8.8 Hz, 1H), 5.98 (s, 1H), 3.22 (d, *J* = 4.9 Hz, 3H). <sup>13</sup>C NMR (126 MHz, CDCl<sub>3</sub>) δ 160.48, 158.07, 149.43, 136.75, 129.62, 123.44, 119.29, 114.59, 28.67. R<sub>f</sub> = 0.54 (DCM/MeOH 10:1).

***N*<sup>2</sup>-Benzyl-6-bromo-*N*<sup>4</sup>-methylquinazoline-2,4-diamine (4):** 80 mg (0.29 mmol) of 6-bromo-2-chloro-*N*-methylquinazolin-4-amine was reacted with benzylamine and purified according to method F<sup>2</sup> to furnish 78 mg of the title compound as a white crystalline solid in 78% yield. <sup>1</sup>H NMR (500 MHz, DMSO) δ 8.27 (s, 1H), 8.10 (s, 1H), 7.64 (d, *J* = 8.9 Hz, 1H), 7.44 (d, *J* = 7.6 Hz, 2H), 7.37 (t, *J* = 7.5 Hz, 2H), 7.27 (dd, *J* = 14.6, 7.7 Hz, 2H), 4.64 (d, *J* = 6.3 Hz, 2H), 3.47 (d, *J* = 4.2 Hz, 1H), 3.02 (d, *J* = 3.1 Hz, 3H). HRMS: *m/z* calculated for C<sub>16</sub>H<sub>16</sub>BrN<sub>4</sub> [M+H]<sup>+</sup> 343.0553; found 343.0544. R<sub>f</sub> = 0.51 (DCM/MeOH 10:1).

**2,4-Dichloro-6-methylquinazoline:** 1.5 g (9.93 mmol) of commercially available 2-Amino-5-methylbenzoic acid was reacted according to general procedure C to give crude 6-methylquinazoline-

2,4(1*H*,3*H*)-dione. Without further purification, 1.6 g (9.52 mmol) of crude 6-methylquinazoline-2,4(1*H*,3*H*)-dione was reacted and purified according to general procedure D to give 465 mg of the title compound as a beige solid in 23% yield. <sup>1</sup>H NMR (500 MHz, CDCl<sub>3</sub>) δ 8.00 (s, 2H), 7.88 (d, *J* = 8.6 Hz, 2H), 7.81 (dd, *J* = 8.6, 1.8 Hz, 2H), 2.60 (s, 7H). <sup>13</sup>C NMR (126 MHz, CDCl<sub>3</sub>) δ 163.07, 154.19, 150.96, 139.97, 138.37, 127.64, 124.66, 122.24, 21.88.

**2-Chloro-*N*,6-dimethylquinazolin-4-amine:** 150 mg (0.70 mmol) of 2,4-dichloro-6-methylquinazoline was reacted with methylamine and purified according to procedure E to furnish 95 mg of the title compound in 66% yield. <sup>1</sup>H NMR (500 MHz, CDCl<sub>3</sub>) δ 7.63 (d, *J* = 8.5 Hz, 1H), 7.53 (dd, *J* = 8.5, 1.1 Hz, 1H), 7.45 (s, 1H), 6.13 (s, 1H), 3.20 (d, *J* = 4.9 Hz, 3H), 2.45 (s, 3H). <sup>13</sup>C NMR (126 MHz, CDCl<sub>3</sub>) δ 161.24, 156.96, 148.85, 136.28, 135.23, 127.42, 120.03, 113.20, 28.51, 21.61. *R*<sub>f</sub> = 0.44 (DCM/MeOH 10:1).

***N*<sup>2</sup>-Benzyl-*N*<sup>4</sup>,6-dimethylquinazoline-2,4-diamine (5):** 80 mg (0.38 mmol) of 2-chloro-*N*,6-dimethylquinazolin-4-amine was reacted with benzylamine and purified according to method F<sup>1</sup> to furnish 47 mg of the title compound as a beige crystalline solid in 57% yield. <sup>1</sup>H NMR (500 MHz, CDCl<sub>3</sub>) δ 7.45 – 7.23 (m, 8H), 5.85 (s, 1H), 5.41 (s, 1H), 4.75 (d, *J* = 5.4 Hz, 2H), 3.10 (d, *J* = 4.8 Hz, 3H), 2.39 (s, 3H). HRMS: *m/z* calculated for C<sub>17</sub>H<sub>19</sub>N<sub>4</sub> [M+H]<sup>+</sup> 279.1604; found 279.1607. *R*<sub>f</sub> = 0.55 (DCM/MeOH 10:1).

**7-Bromo-2,4-dichloroquinazoline:** 5.0 g (23.2 mmol) of commercially available 2-amino-6-bromobenzoic acid was reacted according to general procedure C to give crude 7-bromoquinazoline-2,4(1*H*,3*H*)-dione. Without further purification, 5.2 g (21.6 mmol) of crude 7-bromoquinazoline-2,4(1*H*,3*H*)-dione was reacted and purified according to general procedure D to give 2.82 g of the title compound as a beige solid in 47% yield. <sup>1</sup>H NMR (500 MHz, CDCl<sub>3</sub>) δ 8.19 (d, *J* = 1.6 Hz, 1H), 8.12 (d, *J* = 8.9 Hz, 1H), 7.83 (dd, *J* = 8.9, 1.8 Hz, 1H). <sup>13</sup>C NMR (126 MHz, CDCl<sub>3</sub>) δ 164.02, 156.23, 152.76, 133.01, 131.61, 130.47, 127.20, 121.10. *R*<sub>f</sub> = 0.90 (DCM/MeOH 10:1).

**7-Bromo-2-chloro-*N*-methylquinazolin-4-amine:** 100 mg (0.36 mmol) of 7-bromo-2,4-dichloroquinazoline was reacted with methylamine and purified according to procedure E to furnish 95 mg

of the title compound in 97% yield.  $^1\text{H}$  NMR (500 MHz,  $\text{CDCl}_3$ )  $\delta$  7.93 (d,  $J = 1.7$  Hz, 2H), 7.53 (dt,  $J = 18.2, 5.3$  Hz, 5H), 5.97 (s, 2H), 3.22 (d,  $J = 4.9$  Hz, 7H).  $^{13}\text{C}$  NMR (126 MHz,  $\text{CDCl}_3$ )  $\delta$  161.31, 158.76, 151.61, 130.40, 129.59, 127.99, 121.95, 112.01, 28.64.  $R_f = 0.35$  (DCM/MeOH 10:1).

***N*<sup>2</sup>-Benzyl-7-bromo-*N*<sup>4</sup>-methylquinazoline-2,4-diamine (6):** 90 mg (0.33 mmol) of 7-bromo-2-chloro-*N*-methylquinazolin-4-amine was reacted with benzylamine and purified according to method F<sup>2</sup> to furnish 58 mg of the title compound as a white crystalline solid in 51% yield.  $^1\text{H}$  NMR (500 MHz, methanol-*d*<sub>4</sub>)  $\delta$  7.69 (d,  $J = 8.7$  Hz, 1H), 7.49 (s, 1H), 7.39 – 7.36 (m, 2H), 7.30 (t,  $J = 7.7$  Hz, 2H), 7.23 – 7.20 (m, 1H), 7.19 (dd,  $J = 8.7, 2.0$  Hz, 1H), 4.66 (s, 2H), 3.02 (s, 3H). HRMS:  $m/z$  calculated for  $\text{C}_{16}\text{H}_{16}\text{BrN}_4$  [ $\text{M}+\text{H}$ ]<sup>+</sup> 343.0553; found 343.0548.  $R_f = 0.59$  (DCM/MeOH 10:1).

**2,4-Dichloro-7-methylquinazoline:** 2.38 g (15.8 mmol) of commercially available 2-amino-6-methylbenzoic acid was reacted according to general procedure C to give crude 7-methylquinazoline-2,4(1*H*,3*H*)-dione. Without further purification, 2.8 g (16.4 mmol) of crude 7-methylquinazoline-2,4(1*H*,3*H*)-dione was reacted and purified according to general procedure D to give 1.2 g of the title compound as a beige solid in 34% yield.  $^1\text{H}$  NMR (500 MHz,  $\text{CDCl}_3$ )  $\delta$  7.58 (d,  $J = 8.4$  Hz, 1H), 7.50 (s, 1H), 7.26 – 7.22 (m, 1H), 6.20 (s, 1H), 3.19 (d,  $J = 4.9$  Hz, 3H), 2.47 (s, 3H).  $^{13}\text{C}$  NMR (126 MHz,  $\text{CDCl}_3$ )  $\delta$  161.47, 157.79, 150.81, 144.35, 128.04, 126.97, 120.59, 111.22, 28.46, 21.85.

**2-Chloro-*N*,7-dimethylquinazolin-4-amine:** 150 mg (0.70 mmol) of 2,4-dichloro-7-methylquinazoline was reacted with methylamine and purified according to procedure E to furnish 125 mg of the title compound in 86% yield.  $^1\text{H}$  NMR (500 MHz,  $\text{CDCl}_3$ )  $\delta$  8.12 (d,  $J = 8.6$  Hz, 2H), 7.75 (s, 2H), 7.55 (dd,  $J = 8.6, 1.3$  Hz, 2H), 2.61 (s, 7H).  $^{13}\text{C}$  NMR (126 MHz,  $\text{CDCl}_3$ )  $\delta$  163.40, 155.13, 152.64, 147.95, 131.44, 126.93, 125.65, 120.46, 22.32.  $R_f = 0.38$  (DCM/MeOH 10:1).

***N*<sup>2</sup>-Benzyl-*N*<sup>4</sup>,7-dimethylquinazoline-2,4-diamine (7):** 110 mg (0.53 mmol) of 2-chloro-*N*,7-dimethylquinazolin-4-amine was reacted with benzylamine and purified according to method F<sup>1</sup> to furnish 129 mg of the title compound as a beige crystalline solid in 88% yield.  $^1\text{H}$  NMR (500 MHz,  $\text{CDCl}_3$ )  $\delta$  7.60



(d,  $J = 8.4$  Hz, 1H), 7.51 (s, 1H), 7.25 (dd,  $J = 8.4, 1.7$  Hz, 1H), 4.80 (s, 2H), 3.20 (d,  $J = 4.8$  Hz, 3H), 2.48 (s, 3H). HRMS:  $m/z$  calculated for  $C_{17}H_{19}N_4$   $[M+H]^+$  279.1604; found 279.1598.  $R_f = 0.49$  (DCM/MeOH 10:1).

***N*<sup>4</sup>-Benzyl-6-chloro-*N*<sup>2</sup>-methylquinazoline-2,4-diamine (9):** 80.0 mg (0.26 mmol) of *N*-benzyl-2,6-dichloroquinazolin-4-amine was reacted with methylamine and purified according to general procedure F to furnish 72.0 mg of the title compound as a beige crystalline solid in 67 % yield. <sup>1</sup>H NMR (500 MHz, CDCl<sub>3</sub>)  $\delta$  7.49 – 7.36 (m, 7H), 7.34 (dd,  $J = 5.8, 2.7$  Hz, 1H), 4.79 (s, 2H), 3.06 (s, 3H). <sup>13</sup>C NMR (126 MHz, CDCl<sub>3</sub>)  $\delta$  160.3, 159.0, 150.8, 138.3, 133.1, 129.0, 128.8, 128.0, 127.7, 127.3, 125.7, 120.2, 45.2, 28.4. HRMS:  $m/z$  calculated for  $C_{16}H_{16}ClN_4$   $[M+H]^+$  299.1058; found 299.1058.  $R_f = 0.28$  (DCM/MeOH 10:1).

***N*-Benzyl-6-bromo-2-chloroquinazolin-4-amine:** 0.10 g (0.36 mmol) of 6-bromo-2,4-dichloroquinazoline was reacted with benzylamine and purified according to general procedure E to furnish 0.13 g of the title compound in 99 % yield. <sup>1</sup>H NMR (500 MHz, CDCl<sub>3</sub>)  $\delta$  7.84 – 7.79 (m, 2H), 7.67 (d,  $J = 8.8$  Hz, 1H), 7.44 – 7.36 (m, 5H), 6.01 (s, br, 1H), 4.86 (d,  $J = 5.3$  Hz, 2H). <sup>13</sup>C NMR (126 MHz, CDCl<sub>3</sub>)  $\delta$  159.6, 158.0, 149.7, 138.3, 136.9, 129.7, 129.0, 128.4, 128.3, 123.4, 119.4, 114.4, 46.0.  $R_f = 0.60$  (DCM/MeOH 10:1).

***N*<sup>4</sup>-Benzyl-6-bromo-*N*<sup>2</sup>-methylquinazoline-2,4-diamine (10):** 0.12 g (0.34 mmol) *N*-benzyl-6-bromo-2-chloroquinazolin-4-amine was reacted with methylamine and purified according to general procedure F to furnish 92.0 mg of the title compound as a beige crystalline solid in 88 % yield. <sup>1</sup>H NMR (500 MHz, DMSO)  $\delta$  8.65 (s, br, 1H), 8.48 (s, 1H), 7.75 (d,  $J = 8.9$ , 1H), 7.55 - 7.40 (m, 5H), 6.81 (s, br, 1H), 4.88 (d,  $J = 5.8$  Hz, 2H), 2.98 (t,  $J = 3.6$  Hz, 3H). HRMS:  $m/z$  calculated for  $C_{16}H_{16}BrN_4$   $[M+H]^+$  343.0553; found 343.0549.  $R_f = 0.52$  (DCM/MeOH 10:1).

***N*-Benzyl-2-chloro-6-methylquinazolin-4-amine:** 0.10 g (0.47 mmol) of 2,4-dichloro-6-methylquinazoline was reacted with benzylamine and purified according to general procedure E to furnish

0.13 g of the title compound in 86 % yield.  $^1\text{H}$  NMR (500 MHz,  $\text{CDCl}_3$ )  $\delta$  7.68 (s, 1H), 7.56 (d,  $J = 8.4$  Hz, 1H), 7.45 – 7.32 (m, 6H), 6.05 (s, br, 1H), 4.86 (s, 2H), 2.47 (s, 3H).  $^{13}\text{C}$  NMR (126 MHz,  $\text{CDCl}_3$ )  $\delta$  160.3, 156.9, 149.2, 137.4, 136.39, 135.4, 131.8, 128.9, 128.4, 127.6, 119.9, 113.0, 45.7, 21.6.  $R_f = 0.61$  (DCM/MeOH 10:1).

***N*<sup>4</sup>-Benzyl-*N*<sup>2</sup>,6-dimethylquinazoline-2,4-diamine (11):** 0.11 g (0.41 mmol) *N*-benzyl-2-chloro-6-methylquinazolin-4-amine was reacted with methylamine and purified according to general procedure F to furnish 92.0 mg of the title compound as a beige crystalline solid in 81 % yield.  $^1\text{H}$  NMR (500 MHz,  $\text{CDCl}_3$ )  $\delta$  7.39 – 7.28 (m, 8H), 4.81 (d,  $J = 5.4$  Hz, 2H), 3.05 (d,  $J = 5.1$  Hz, 3H), 2.37 (s, 3H). HRMS:  $m/z$  calculated for  $\text{C}_{17}\text{H}_{19}\text{N}_4$   $[\text{M}+\text{H}]^+$  279.1604; found 279.1595.  $R_f = 0.55$  (DCM/MeOH 10:1).

***N*-Benzyl-2-chloro-6-methoxyquinazolin-4-amine:** 0.10 g (0.51 mmol) of 2,4-dichloro-6-methoxyquinazoline was reacted with benzylamine and purified according to general procedure E to furnish 0.12 g of the title compound in 93 % yield.  $^1\text{H}$  NMR (500 MHz,  $\text{CDCl}_3$ )  $\delta$  7.69 (d,  $J = 9.1$  Hz, 1H), 7.38 (m, 6H), 6.95 (d,  $J = 2.4$  Hz, 1H), 6.16 (s, br, 1H), 4.86 (d,  $J = 5.2$  Hz, 2H), 3.86 (s, 3H).  $^{13}\text{C}$  NMR (126 MHz,  $\text{CDCl}_3$ )  $\delta$  160.1, 157.7, 155.5, 146.1, 137.5, 129.3, 128.9, 128.4, 128.0, 124.4, 113.6, 100.5, 55.8, 45.8.  $R_f = 0.63$  (DCM/MeOH 10:1).

***N*<sup>4</sup>-Benzyl-6-methoxy-*N*<sup>2</sup>-methylquinazoline-2,4-diamine (12):** 0.10 g (0.33 mmol) *N*-benzyl-2-chloro-6-methoxyquinazolin-4-amine was reacted with methylamine and purified according to general procedure F to furnish 85.0 mg of the title compound as a beige crystalline solid in 78 % yield.  $^1\text{H}$  NMR (500 MHz, DMSO)  $\delta$  8.74 (s, br, 1H), 7.82 (s, 1H), 7.61 (d,  $J = 6.7$  Hz, 2H), 7.57 – 7.38 (m, 5H), 6.66 (s, 1H), 4.96 (s, 2H), 4.02 (s, 3H), 3.02 (s, 3H). HRMS:  $m/z$  calculated for  $\text{C}_{17}\text{H}_{19}\text{N}_4\text{O}$   $[\text{M}+\text{H}]^+$  295.1553; found 295.1543.  $R_f = 0.29$  (DCM/MeOH 10:1).

***N*-Benzyl-2,7-dichloroquinazolin-4-amine:** 0.20 g (0.86 mmol) of 2,4,7-trichloroquinazoline was reacted with benzylamine and purified according to general procedure E to furnish 0.26 g of the title compound in 98 % yield.  $^1\text{H}$  NMR (500 MHz,  $\text{CDCl}_3$ )  $\delta$  7.74 (s, 1H), 7.62 (d,  $J = 8.8$  Hz, 1H), 7.42 – 7.32 (m, 6H), 6.18

(s, br, 1H), 4.85 (d,  $J = 5.2$  Hz, 2H).  $^{13}\text{C}$  NMR (126 MHz,  $\text{CDCl}_3$ )  $\delta$  160.4, 158.8, 151.7, 139.8, 137.0, 129.0, 128.4, 128.2, 127.1, 127.0, 122.2, 111.5, 45.9.  $R_f = 0.66$  (DCM/MeOH 10:1).

***N*<sup>4</sup>-Benzyl-7-chloro-*N*<sup>2</sup>-methylquinazoline-2,4-diamine (13):** 0.25 g (0.82 mmol) *N*-benzyl-2,7-dichloroquinazolin-4-amine was reacted with methylamine and purified according to general procedure F to furnish 77.0 mg of the title compound as a beige crystalline solid in 48% yield.  $^1\text{H}$  NMR (500 MHz,  $\text{CD}_3\text{OD}$ )  $\delta$  7.85 (d,  $J = 8.7$  Hz, 1H), 7.42 – 7.28 (m, 5H), 7.21 (d,  $J = 10.6$ , 1H), 7.03 (d,  $J = 8.7$ , 1H), 4.78 (s, 2H), 2.93 (s, 3H). HRMS:  $m/z$  calculated for  $\text{C}_{16}\text{H}_{16}\text{ClN}_4$   $[\text{M}+\text{H}]^+$  299.1058; found 299.1046.  $R_f = 0.38$  (DCM/MeOH 10:1).

***N*-Benzyl-7-bromo-2-chloroquinazolin-4-amine:** 0.10 g (0.36 mmol) of 7-bromo-2,4-dichloroquinazoline was reacted with benzylamine and purified according to general procedure E to furnish 0.12 g of the title compound in 97% yield.  $^1\text{H}$  NMR (500 MHz,  $\text{CDCl}_3$ )  $\delta$  7.94 (s, 1H), 7.53 (s, 2H), 7.43 – 7.33 (m, 5H), 6.1 (s, br, 1H) 4.85 (d,  $J = 5.3$  Hz, 2H).  $^{13}\text{C}$  NMR (126 MHz,  $\text{CDCl}_3$ )  $\delta$  159.6, 158.0, 149.7, 138.3, 136.9, 129.7, 129.0, 128.4, 128.3, 123.4, 119.4, 114.4, 45.9.  $R_f = 0.71$  (DCM/MeOH 10:1).

***N*<sup>4</sup>-Benzyl-7-bromo-*N*<sup>2</sup>-methylquinazoline-2,4-diamine (14):** 0.11 g (0.33 mmol) *N*-benzyl-7-bromo-2-chloroquinazolin-4-amine was reacted with methylamine and purified according to general procedure F to furnish 90.0 mg of the title compound as a beige crystalline solid in 79% yield.  $^1\text{H}$  NMR (500 MHz,  $\text{DMSO}-d_6$ )  $\delta$  8.70 (s, 1H), 8.20 (d,  $J = 9.0$  Hz, 1H), 7.56 (dd,  $J = 27.3, 7.7$  Hz, 5H), 7.41 (dd,  $J = 29.9, 7.6$  Hz, 2H), 6.91 (s, 1H), 4.92 (s, 2H), 3.71 (s, 1H), 3.01 (s, 3H). HRMS:  $m/z$  calculated for  $\text{C}_{16}\text{H}_{16}\text{BrN}_4$   $[\text{M}+\text{H}]^+$  343.0553; found 343.0543.  $R_f = 0.58$  (DCM/MeOH 10:1).

***N*-Benzyl-2-chloro-7-methylquinazolin:** 0.10 g (0.47 mmol) of 2,4-dichloro-7-methylquinazoline was reacted with benzylamine and purified according to general procedure E to furnish 0.12 g of the title compound in 96% yield.  $^1\text{H}$  NMR (500 MHz,  $\text{CDCl}_3$ )  $\delta$  7.57 (d,  $J = 8.4$  Hz, 1H), 7.54 (s, 1H), 7.42 – 7.31 (m, 5H), 7.27 – 7.24 (m, 1H), 4.85 (d,  $J = 5.3$  Hz, 2H), 2.49 (s, 3H).  $^{13}\text{C}$  NMR (126 MHz,  $\text{CDCl}_3$ )  $\delta$  160.6,

157.7, 151.1, 144.5, 137.4, 128.9, 128.3, 128.1, 127.2, 120.6, 111.0, 45.7, 28.4, 21.9.  $R_f = 0.68$  (DCM/MeOH 10:1).

***N*<sup>4</sup>-Benzyl-*N*<sup>2</sup>,7-dimethylquinazoline-2,4-diamine (15):** 0.10 g (0.35 mmol) *N*-benzyl-2-chloro-7-methylquinazolin was reacted with methylamine and purified according to general procedure F to furnish 77.0 mg of the title compound as a beige crystalline solid in 76 % yield. <sup>1</sup>H NMR (500 MHz, CDCl<sub>3</sub>) δ 7.41 – 7.34 (m, 5H), 7.31 (d, *J* = 6.9 Hz, 2H), 6.89 (d, *J* = 8.2 Hz, 1H), 4.80 (d, *J* = 5.4 Hz, 2H), 3.06 (d, *J* = 5.0 Hz, 3H), 2.41 (s, 3H). HRMS: *m/z* calculated for C<sub>17</sub>H<sub>19</sub>N<sub>4</sub> [M+H]<sup>+</sup> 279.1604; found 279.1597.  $R_f = 0.47$  (DCM/MeOH 10:1).

***N*<sup>4</sup>-Methyl-*N*<sup>2</sup>-phenethylquinazoline-2,4-diamine (16):** 0.10 g (0.52 mmol) of 2-chloro-*N*-methylquinazolin-4-amine was reacted with phenethylamine and purified according to general procedure F to furnish 55.0 mg of the title compound as a beige crystalline solid in 55 % yield. <sup>1</sup>H NMR (500 MHz, CDCl<sub>3</sub>) δ 7.63 (d, *J* = 8.2 Hz, 1H), 7.53 – 7.44 (m, 2H), 7.29 (q, *J* = 6.4, 5.1 Hz, 2H), 7.27 – 7.18 (m, 3H), 7.03 (td, *J* = 7.1, 6.1, 1.7 Hz, 1H), 6.46 (s, 1H), 5.36 (s, 1H), 3.79 (t, *J* = 7.4 Hz, 2H), 3.09 (s, 3H), 2.95 (t, *J* = 7.3 Hz, 2H). HRMS: *m/z* calculated for C<sub>17</sub>H<sub>19</sub>N<sub>4</sub> [M+H]<sup>+</sup> 279.1604; found 279.1602.  $R_f = 0.40$  (DCM/MeOH 10:1).

**6-Chloro-*N*<sup>4</sup>-methyl-*N*<sup>2</sup>-phenethylquinazoline-2,4-diamine (17):** 90.0 mg (0.39 mmol) 2,6-dichloro-*N*-methylquinazolin-4-amine was reacted with phenethylamine and purified according to general procedure F to furnish 55.0 mg of the title compound as a beige crystalline solid in 48 % yield. <sup>1</sup>H NMR (400 MHz, CDCl<sub>3</sub>) δ 7.44 – 7.40 (m, 2H), 7.35 (d, *J* = 9.4 Hz, 1H), 7.31 – 7.24 (m, 4H), 7.23 – 7.17 (m, 1H), 5.53 (s, 1H), 5.08 (s, 1H), 3.75 (q, *J* = 6.8 Hz, 2 Hz), 3.08 (d, *J* = 4.8 Hz, 3H), 2.93 (t, *J* = 7.2 Hz, 2H). HRMS: *m/z* calculated for C<sub>17</sub>H<sub>18</sub>ClN<sub>4</sub> [M+H]<sup>+</sup> 312.8073; found 312.7996.  $R_f = 0.38$  (DCM/MeOH 10:1).

**6-Methoxy-*N*<sup>4</sup>-methyl-*N*<sup>2</sup>-phenethylquinazoline-2,4-diamine (18):** 60.0 mg (0.20 mmol) 2,4-dichloro-6-methoxyquinazoline was reacted with phenethylamine and purified according to general procedure F to furnish 17.0 mg of the title compound as a beige crystalline solid in 23 % yield. <sup>1</sup>H NMR (500 MHz, CDCl<sub>3</sub>)

$\delta$  7.43 (d,  $J = 9.1$  Hz, 1H), 7.34 – 7.25 (m, 4H), 7.25 – 7.18 (m, 2H), 6.88 (d,  $J = 2.7$  Hz, 1H), 5.75 (s, 1H), 5.06 (s, 1H), 3.81 (s, 3H), 3.80 – 3.75 (m, 2H), 3.14 (d,  $J = 4.7$  Hz, 3H), 2.96 (t,  $J = 7.2$  Hz, 2H).  $R_f = 0.29$  (DCM/MeOH 10:1).

**6-Bromo- $N^4$ -methyl- $N^2$ -phenethylquinazoline-2,4-diamine (19):** 65.0 mg (0.24 mmol) 6-bromo-2-chloro- $N$ -methylquinazolin-4-amine was reacted with phenethylamine and purified according to general procedure F to furnish 31.0 mg of the title compound as a beige crystalline solid in 37 % yield.  $^1\text{H}$  NMR (500 MHz,  $\text{CDCl}_3$ )  $\delta$  7.64 (d,  $J = 2.2$  Hz, 1H), 7.57 (dd,  $J = 8.9, 2.2$  Hz, 1H), 7.32 (t,  $J = 7.5$  Hz, 3H), 7.29 – 7.25 (m, 2H), 7.25 – 7.21 (m, 1H), 5.72 (s, 1H), 5.28 (s, 1H), 3.77 (q,  $J = 7.0$  Hz, 2H), 3.11 (d,  $J = 4.6$  Hz, 3H), 2.96 (t,  $J = 7.2$  Hz, 2H). HRMS:  $m/z$  calculated for  $\text{C}_{17}\text{H}_{18}\text{BrN}_4$   $[\text{M}+\text{H}]^+$  357.0709; found 357.0714.  $R_f = 0.59$  (DCM/MeOH 10:1).

**$N^4,6$ -Dimethyl- $N^2$ -phenethylquinazoline-2,4-diamine (20):** 75.0 mg (0.36 mmol) 2-chloro- $N,6$ -dimethylquinazolin-4-amine was reacted with phenethylamine and purified according to general procedure F to furnish 49.0 mg of the title compound as a beige crystalline solid in 46 % yield.  $^1\text{H}$  NMR (500 MHz,  $\text{CDCl}_3$ )  $\delta$  7.39 (d,  $J = 8.3$  Hz, 1H), 7.35 (d,  $J = 8.5$  Hz, 1H), 7.33 – 7.28 (m, 2H), 7.26 (d,  $J = 7.4$  Hz, 2H), 7.21 (d,  $J = 6.5$  Hz, 2H), 6.28 (s, 1H), 5.37 (s, 1H), 3.78 (t,  $J = 6.5$  Hz, 2H), 3.09 (s, 3H), 2.96 (t,  $J = 6.5$  Hz, 2H), 2.34 (s, 3H). HRMS:  $m/z$  calculated for  $\text{C}_{18}\text{H}_{21}\text{N}_4\text{O}$   $[\text{M}+\text{H}]^+$  293.1761; found 293.1764.  $R_f = 0.34$  (DCM/MeOH 10:1).

**$N^2$ -Benzyl- $N^4$ -methyl-6-vinylquinazoline-2,4-diamine (22):** 50 mg (0.14 mmol) of  $N^2$ -benzyl-6-bromo- $N^4$ -methylquinazoline-2,4-diamine was reacted with commercially available vinyl boronic acid dibutyl ester and purified according to procedure A to furnish 13 mg of the title compound as a yellow solid in 31% yield.  $^1\text{H}$  NMR (500 MHz, methanol- $d_4$ )  $\delta$  7.84 (d,  $J = 1.9$  Hz, 1H), 7.68 (dd,  $J = 8.7, 1.9$  Hz, 1H), 7.38 (d,  $J = 6.9$  Hz, 2H), 7.29 (t,  $J = 7.6$  Hz, 3H), 7.21 (t,  $J = 7.3$  Hz, 1H), 6.75 (dd,  $J = 17.6, 11.0$  Hz, 1H), 5.78 (d,  $J = 17.6$  Hz, 1H), 5.21 (d,  $J = 11.0$  Hz, 1H), 4.67 (s, 2H), 3.04 (s, 3H). HRMS:  $m/z$  calculated for  $\text{C}_{18}\text{H}_{19}\text{N}_4$   $[\text{M}+\text{H}]^+$  291.1604; found 291.1633.  $R_f = 0.33$  (DCM/MeOH 10:1).

***N*<sup>2</sup>-Benzyl-6-ethyl-*N*<sup>4</sup>-methylquinazoline-2,4-diamine (23):** 10 mg (0.03 mmol) of *N*<sup>2</sup>-benzyl-*N*<sup>4</sup>-methyl-6-vinylquinazoline-2,4-diamine was reacted with palladium on carbon in a 10 mL round bottom flask affixed with a hydrogen balloon and purified according to procedure B to furnish 7 mg of the title compound as a yellow solid in 70% yield. <sup>1</sup>H NMR (500 MHz, DMSO-*d*<sub>6</sub>) δ 7.67 (d, *J* = 8.6 Hz, 1H), 7.62 (s, 1H), 7.52 (d, *J* = 7.38 Hz, 2H), 7.36 (t, *J* = 7.4 Hz, 2H), 7.33 (d, *J* = 8.6 Hz, 1H), 7.25 (t, *J* = 7.4 Hz, 1H), 4.64 (d, *J* = 5.9 Hz, 2H), 2.98 (d, *J* = 5.2 Hz, 3H), 2.65 (q, *J* = 7.3 Hz, 2H), 1.31 (t, *J* = 7.3 Hz, 3H). HRMS: *m/z* calculated for C<sub>18</sub>H<sub>21</sub>N<sub>4</sub> [M+H]<sup>+</sup> 293.1761; found 293.1768. R<sub>f</sub> = 0.31 (DCM/MeOH 9:1).

***N*<sup>2</sup>-Benzyl-*N*<sup>4</sup>-methyl-6-(prop-1-en-2-yl)quinazoline-2,4-diamine (24):** 80 mg (0.23 mmol) of *N*<sup>2</sup>-benzyl-6-bromo-*N*<sup>4</sup>-methylquinazoline-2,4-diamine was reacted with commercially available isopentyl pinacol boronic ester and purified according to procedure A to furnish 22 mg of the title compound as a yellow solid in 31% yield. <sup>1</sup>H NMR (500 MHz, DMSO-*d*<sub>6</sub>) δ 8.05 – 7.90 (m, 3H), 7.52 (d, *J* = 7.4 Hz, 2H), 7.36 (t, *J* = 7.4 Hz, 2H), 7.25 (t, *J* = 7.4 Hz, 1H), 5.68 (s, 1H), 5.32 (s, 1H), 4.64 (d, *J* = 5.9 Hz, 2H), 2.99 (d, *J* = 5.2 Hz, 3H), 2.32 (s, 3H). HRMS: *m/z* calculated for C<sub>19</sub>H<sub>21</sub>N<sub>4</sub> [M+H]<sup>+</sup> 305.1761; found 305.1766. R<sub>f</sub> = 0.31 (DCM/MeOH 9:1).

***N*<sup>2</sup>-Benzyl-6-isopropyl-*N*<sup>4</sup>-methylquinazoline-2,4-diamine (25):** 10 mg (0.03 mmol) of *N*<sup>2</sup>-benzyl-*N*<sup>4</sup>-methyl-6-(prop-1-en-2-yl)quinazoline-2,4-diamine was reacted with palladium on carbon in a 10 mL round bottom flask affixed with a hydrogen balloon and purified according to procedure B to furnish 5 mg of the title compound as a yellow solid in 50% yield. <sup>1</sup>H NMR (500 MHz, DMSO-*d*<sub>6</sub>) δ 7.69 (s, 1 H), 7.57 – 7.48 (m, 4H), 7.36 (t, *J* = 7.4 Hz, 2H), 7.25 (t, *J* = 7.4 Hz, 1H), 4.64 (d, *J* = 5.9 Hz, 2H), 3.14 (sept, *J* = 6.9 Hz, 1H), 2.99 (d, *J* = 5.2 Hz, 3H), 1.32 (d, *J* = 6.9 Hz, 6H). HRMS: *m/z* calculated for C<sub>19</sub>H<sub>23</sub>N<sub>4</sub> [M+H]<sup>+</sup> 307.1917; found 307.1643. R<sub>f</sub> = 0.28 (DCM/MeOH 9:1).

**(*E*)-*N*<sup>2</sup>-Benzyl-*N*<sup>4</sup>-methyl-6-(pent-1-en-1-yl)quinazoline-2,4-diamine (26):** 80 mg (0.23 mmol) of *N*<sup>2</sup>-benzyl-6-bromo-*N*<sup>4</sup>-methylquinazoline-2,4-diamine was reacted with commercially available (*E*)-1-Pentenyl pinacol boronic ester and purified according to procedure A to furnish 24 mg of the title compound

as a yellow solid in 31% yield.  $^1\text{H}$  NMR (500 MHz, DMSO- $d_6$ )  $\delta$  8.11 (s, 1 H), 7.65 – 7.56 (m, 2H), 7.52 (d,  $J = 7.4$  Hz, 2H), 7.36 (t,  $J = 7.4$  Hz, 2H), 7.25 (t,  $J = 7.4$  Hz, 1H), 6.93 – 6.78 (m, 2H), 4.64 (d,  $J = 5.9$  Hz, 2H), 2.99 (d,  $J = 5.2$  Hz, 3H), 2.17 (td,  $J = 7.4, 6.7$  Hz, 2H), 1.48 (sext,  $J = 7.4$  Hz, 2H), 0.95 (t,  $J = 7.2$  Hz, 3H). HRMS:  $m/z$  calculated for  $\text{C}_{21}\text{H}_{25}\text{N}_4$   $[\text{M}+\text{H}]^+$  333.2074; found 333.2064.  $R_f = 0.33$  (DCM/MeOH 9:1).

**$N^2$ -Benzyl- $N^4$ -methyl-6-pentylquinazoline-2,4-diamine (27):** 11 mg (0.03 mmol) of (*E*)- $N^2$ -benzyl- $N^4$ -methyl-6-(pent-1-en-1-yl)quinazoline-2,4-diamine was reacted with palladium on carbon and purified according to procedure B to furnish 7 mg of the title compound as a yellow solid in 70% yield.  $^1\text{H}$  NMR (500 MHz, methanol- $d_4$ )  $\delta$  7.66 (d,  $J = 1.8$  Hz, 1H), 7.42 (dd,  $J = 8.5, 1.9$  Hz, 1H), 7.38 (d,  $J = 7.2$  Hz, 2H), 7.29 (td,  $J = 8.5, 8.0, 2.5$  Hz, 3H), 7.21 (t,  $J = 7.3$  Hz, 1H), 4.67 (s, 2H), 3.05 (s, 3H), 2.66 (t,  $J = 7.7$  Hz, 2H), 1.65 (p,  $J = 7.5$  Hz, 2H), 1.41 – 1.25 (m, 4H), 0.91 (t,  $J = 6.9$  Hz, 3H). HRMS:  $m/z$  calculated for  $\text{C}_{21}\text{H}_{27}\text{N}_4$   $[\text{M}+\text{H}]^+$  335.2230; found 335.2083.

**$N^2$ -Benzyl-6-(cyclopent-1-en-1-yl)- $N^4$ -methylquinazoline-2,4-diamine (28):** 80 mg (0.23 mmol) of  $N^2$ -benzyl-6-bromo- $N^4$ -methylquinazoline-2,4-diamine was reacted with commercially available 1-cyclopentenylboronic acid pinacol ester and purified according to procedure A to furnish 8 mg of the title compound as a yellow solid in 10% yield.  $^1\text{H}$  NMR (500 MHz,  $\text{CDCl}_3$ )  $\delta$  7.74 (dd,  $J = 8.7, 2.0$  Hz, 1H), 7.49 – 7.36 (m, 7H), 7.32 (t,  $J = 7.4$  Hz, 2H), 7.29 – 7.22 (m, 2H), 6.18 (p,  $J = 2.1$  Hz, 1H), 5.83 (s, 1H), 4.74 (d,  $J = 4.9$  Hz, 2H), 3.12 (d,  $J = 4.6$  Hz, 3H), 2.74 (dp,  $J = 7.7, 2.4$  Hz, 2H), 2.56 (tq,  $J = 7.5, 2.5$  Hz, 2H), 2.05 (p,  $J = 7.5$  Hz, 2H). HRMS:  $m/z$  calculated for  $\text{C}_{21}\text{H}_{23}\text{N}_4$   $[\text{M}+\text{H}]^+$  331.1917; found 331.1995.  $R_f = 0.33$  (DCM/MeOH 9:1).

**$N^2$ -Benzyl-6-(cyclohex-1-en-1-yl)- $N^4$ -methylquinazoline-2,4-diamine (29):** 80 mg (0.14 mmol) of  $N^2$ -benzyl-6-bromo- $N^4$ -methylquinazoline-2,4-diamine was reacted with commercially available cyclohexenyl boronic acid and purified according to procedure A to furnish 11 mg of the title compound as a yellow solid in 14% yield.  $^1\text{H}$  NMR (500 MHz, methanol- $d_4$ )  $\delta$  7.84 (d,  $J = 2.0$  Hz, 1H), 7.67 (dd,  $J = 8.7, 2.1$  Hz, 1H),

7.38 (d,  $J = 7.2$  Hz, 2H), 7.30 (dt,  $J = 9.9, 7.7$  Hz, 3H), 7.22 (t,  $J = 7.3$  Hz, 1H), 6.18 (tt,  $J = 4.1, 1.7$  Hz, 1H), 4.68 (s, 2H), 3.06 (s, 3H), 2.45 (tq,  $J = 6.4, 2.2$  Hz, 2H), 2.23 (ddt,  $J = 8.4, 6.4, 3.3$  Hz, 2H), 1.85 – 1.78 (m, 2H), 1.71 – 1.64 (m, 2H). HRMS:  $m/z$  calculated for  $C_{22}H_{25}N_4$   $[M+H]^+$  345.2074; found 345.2077.  $R_f = 0.33$  (DCM/MeOH 9:1).

***N*<sup>2</sup>-Benzyl-6-cyclohexyl-*N*<sup>4</sup>-methylquinazoline-2,4-diamine (30):** 10 mg (0.03 mmol) of *N*<sup>2</sup>-benzyl-6-(cyclohex-1-en-1-yl)-*N*<sup>4</sup>-methylquinazoline-2,4-diamine was reacted with palladium on carbon and purified according to procedure B to furnish 8 mg of the title compound as a yellow solid in 80% yield. <sup>1</sup>H NMR (500 MHz, methanol-*d*<sub>4</sub>)  $\delta$  7.69 (d,  $J = 1.9$  Hz, 1H), 7.45 (dd,  $J = 8.5, 2.0$  Hz, 1H), 7.38 (d,  $J = 7.0$  Hz, 2H), 7.29 (td,  $J = 8.3, 7.8, 2.1$  Hz, 3H), 7.21 (t,  $J = 7.4$  Hz, 1H), 4.67 (s, 2H), 3.05 (s, 3H), 2.56 (tt,  $J = 11.7, 3.2$  Hz, 1H), 1.91 – 1.82 (m, 5H), 1.81 – 1.74 (m, 1H), 1.53 (dd,  $J = 12.4, 2.9$  Hz, 1H), 1.50 – 1.45 (m, 2H), 1.43 (t,  $J = 3.3$  Hz, 1H). HRMS:  $m/z$  calculated for  $C_{22}H_{27}N_4$   $[M+H]^+$  347.2230; found 347.2231.  $R_f = 0.32$  (DCM/MeOH 9:1).

***N*<sup>2</sup>-Benzyl-*N*<sup>4</sup>-methyl-6-phenylquinazoline-2,4-diamine (31):** 50 mg (0.14 mmol) of *N*<sup>2</sup>-benzyl-6-bromo-*N*<sup>4</sup>-methylquinazoline-2,4-diamine was reacted with commercially available phenyl boronic acid and purified according to procedure A to furnish 11 mg of the title compound as a yellow solid in 22% yield. <sup>1</sup>H NMR (500 MHz, methanol-*d*<sub>4</sub>)  $\delta$  8.17 (s, 1H), 7.91 – 7.85 (m, 1H), 7.68 (d,  $J = 7.7$  Hz, 2H), 7.48 – 7.38 (m, 5H), 7.33 (q,  $J = 7.6$  Hz, 3H), 7.24 (t,  $J = 7.5$  Hz, 1H), 4.71 (s, 2H), 3.08 (s, 3H). HRMS:  $m/z$  calculated for  $C_{22}H_{21}N_4$   $[M+H]^+$  341.1761; found 341.1763.  $R_f = 0.36$  (DCM/MeOH 10:1).

***N*<sup>2</sup>-Benzyl-6-(furan-2-yl)-*N*<sup>4</sup>-methylquinazoline-2,4-diamine (32):** 50 mg (0.14 mmol) of *N*<sup>2</sup>-benzyl-6-bromo-*N*<sup>4</sup>-methylquinazoline-2,4-diamine was reacted with commercially available 2-furyl boronic acid and purified according to procedure A to furnish 6 mg of the title compound as a yellow solid in 13% yield. <sup>1</sup>H NMR (500 MHz, methanol-*d*<sub>4</sub>)  $\delta$  8.19 (d,  $J = 1.8$  Hz, 1H), 7.87 (dd,  $J = 8.8, 1.9$  Hz, 1H), 7.55 (d,  $J = 1.8$  Hz, 1H), 7.39 (d,  $J = 7.3$  Hz, 2H), 7.35 (d,  $J = 8.8$  Hz, 1H), 7.31 (dd,  $J = 8.5, 6.8$  Hz, 2H), 7.22 (t,  $J =$



7.3 Hz, 1H), 6.75 (d,  $J = 3.3$  Hz, 1H), 6.52 (dd,  $J = 3.4, 1.8$  Hz, 1H), 4.68 (s, 2H), 3.06 (s, 3H). HRMS:  $m/z$  calculated for  $C_{20}H_{19}N_4O$   $[M+H]^+$  331.1553; found 331.1549.  $R_f = 0.43$  (DCM/MeOH 10:1).

**Table S1. *A. baumannii* strains used in this study.** Strains used in this study are listed below along with their resistance profiles and provenance. The stains were chosen based on creating a screening panel of isolates with broad spectrum of resistance and clonal diversity.

| <b>Strain ID</b> | <b>Identifying features</b>                                                                                                                                                                                                                                                 | <b>Provenance</b>     | <b>References</b>        |
|------------------|-----------------------------------------------------------------------------------------------------------------------------------------------------------------------------------------------------------------------------------------------------------------------------|-----------------------|--------------------------|
| <b>1403</b>      | R=Ampicillin, Ciprofloxacin, Gentamycin, PolymyxinB, Sulfamethoxazole, Trimethoprim, Sulfamethoxazole<br><br>S= Rifampin, Chloramphenicol, Tetracycline, Imepenem                                                                                                           | Moffitt Cancer Center | Fleeman et al. (2015)(1) |
| <b>1646</b>      | R= Sulfamethoxazole, Ciprofloxacin, Ampicillin, Trimethoprim<br><br>S= Meropenem, Imipenem, Amikacin, Aztreonam, Amp-Sulbactam, Gentamycin, Piperacillin, Polymyxin B, Rifampin, Chloramphenicol, Cefepime, Cefotaxime, Ceftazidime, Ceftriaxone, Tetracycline, Tobramycin, | ATCC (1951)           | Jacobs et al. (2010)(2)  |
| <b>1649</b>      | R= Ampicillin, Aztreonam, Cefotaxime, Sulfamethoxazole, Ceftriaxone, Tetracycline, Trimethoprim<br><br>S= Amikacin, Amp-Sulbactam, Cefepime, Gentamycin, Piperacillin, Timentin, Tobramycin, Levofloxacin, Polymyxin B, Rifampin, Ciprofloxacin, Chloramphenicol            | CDC (TX, 1998)        | Jacobs et al. (2010)(2)  |
| <b>1650</b>      | R= Ampicillin, Aztreonam, Sulfamethoxazole, Tetracycline, Chloramphenicol, Trimethoprim<br><br>S= Amikacin, Amp-Sulbactam, Cefepime, Gentamycin, Piperacillin, Timentin, Tobramycin, Levofloxacin, Polymyxin B, Rifampin, Ciprofloxacin, Cefotaxime, Ceftriaxone            | CDC (TX, 1998)        | Jacobs et al. (2010)(2)  |
| <b>1651</b>      | R= Ampicillin, Aztreonam, Sulfamethoxazole, Chloramphenicol, Trimethoprim<br><br>S= Amikacin, Amp-Sulbactam, Cefepime, Gentamycin, Piperacillin, Timentin, Tobramycin, Levofloxacin, Polymyxin B, Rifampin, Ciprofloxacin, Cefotaxime, Ceftriaxone, Tetracycline            | CDC (TX, 1998)        | Jacobs et al. (2010)(2)  |
| <b>1652</b>      | R= Ampicillin, Aztreonam, Chloramphenicol, Sulfamethoxazole, Trimethoprim<br><br>S= Imipenem, meropenem, amikacin, Amp-Sulbactam, Levofloxacin, Cefepime, Cefotaxime, Ceftazidime, Ceftriaxone, Ciprofloxacin, Gentamicin, Piperacillin, Timentin, Tobramycin               | CDC (TX, 1998)        | Jacobs et al. (2010)(2)  |

**Table S2. In vitro antibacterial assessment of front runner quinazoline compounds against a library of *A. baumannii* strains.** Lead quinazolines were screened for MIC, MBC<sub>90</sub>, and MBEC<sub>90</sub> against six *A. baumannii* strains (1403, 1646, 1649, 1650, 1651 and 1652). All data is in  $\mu$ M.

|                          | <b>4</b> | <b>5</b> | <b>26</b> | <b>29</b> | <b>27</b> | <b>30</b> | <b>SMX*</b> | <b>TMP*</b> |
|--------------------------|----------|----------|-----------|-----------|-----------|-----------|-------------|-------------|
| <b>MIC</b>               |          |          |           |           |           |           |             |             |
| 1403                     | 25       | 10       | 10        | 3         | 15        | 20        | 138         | 103         |
| 1646                     | 0.5      | 1        | 1         | 2         | 1         | 2         | 118         | 34          |
| 1649                     | 11       | 21       | 10        | 8         | 10        | 15        | 118         | 517         |
| 1650                     | 12       | 35       | 25        | 10        | 10        | 20        | 118         | 120         |
| 1651                     | 5        | 7        | 2         | 2         | 10        | 20        | 118         | 103         |
| 1652                     | 20       | 20       | 30        | 30        | 20        | 20        | 118         | 103         |
| <b>MBC<sub>90</sub></b>  |          |          |           |           |           |           |             |             |
| 1403                     | 22       | 30       | 40        | 22        | 20        | 32        | 152         | 103         |
| 1646                     | 0.81     | 0.77     | 1.8       | 1.5       | 1.1       | 1.1       | 120         | 45          |
| 1649                     | 4.7      | 9.3      | 10        | 9.1       | 43        | 33        | 134         | >517        |
| 1650                     | 15       | 27       | 16        | 16        | 20        | 22        | 138         | 157         |
| 1651                     | 2.1      | 1.5      | 5.7       | 4.0       | 4.1       | 28        | 150         | 166         |
| 1652                     | 9.7      | 12       | 23        | 11        | 23        | 17        | 124         | 136         |
| <b>MBEC<sub>90</sub></b> |          |          |           |           |           |           |             |             |
| 1403                     | 26       | 13       | 24        | 20        | 12        | 21        | 189         | >200        |
| 1646                     | 3.3      | 2.8      | 8.9       | 8.9       | 12        | 41        | 167         | 100         |
| 1649                     | 44.33    | 34       | 63        | 58        | 62        | 68        | 175         | >200        |
| 1650                     | 9.61     | 21       | 50        | 48        | 49        | 46        | 180         | >200        |
| 1651                     | 37.34    | 11       | 24        | 21        | 18        | 33        | 192         | >200        |
| 1652                     | > 100    | 68       | 97        | 77        | 64        | >100      | 145         | >200        |

\*SMX, sulfamethoxazole; TMP, trimethoprim

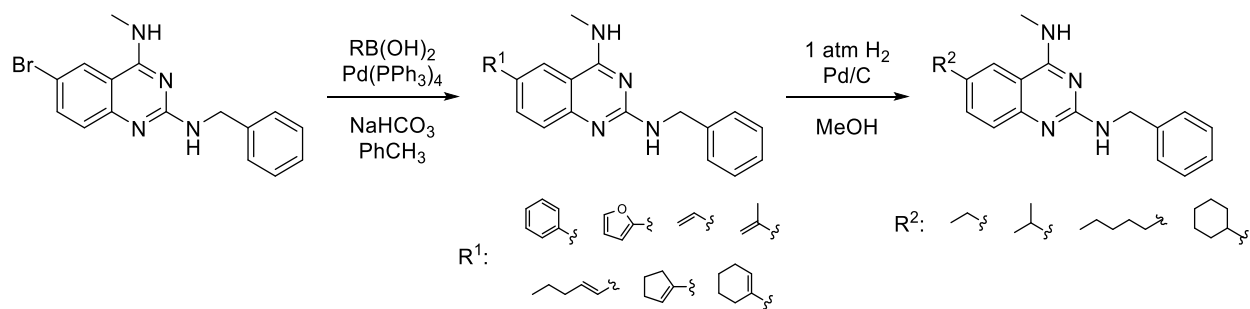

**Figure S1.** Synthesis of 6-aryl/vinyl/alkyl- $N^2$ -benzyl- $N^4$ -methylquinazolin-2,4-diamines from  $N^2$ -benzyl-6-bromo- $N^4$ -methylquinazolin-2,4-diamine

## References:

1. **Fleeman R, LaVoi TM, Santos RG, Morales A, Nefzi A, Welmaker GS, Medina-Franco JL, Giulianotti MA, Houghten RA, Shaw LN.** 2015. Combinatorial Libraries As a Tool for the Discovery of Novel, Broad-Spectrum Antibacterial Agents Targeting the ESKAPE Pathogens. *J Med Chem* doi:10.1021/jm501628s.
2. **Jacobs AC, Hood I, Boyd KL, Olson PD, Morrison JM, Carson S, Sayood K, Iwen PC, Skaar EP, Dunman PM.** 2010. Inactivation of Phospholipase D Diminishes *Acinetobacter baumannii* Pathogenesis. *Infection and Immunity* **78**:1952-1962.
